# Supplementary material for: Serum chemistry profiling and prognostication in systemic mastocytosis: a registry-based study of the ECNM and GREM
Source: PubMed Central journal article supplement — Blood Adv. 2024 Apr 11;8(11):2890–900. doi: 10.1182/bloodadvances.2024012756 (PMC11214361; doi:10.1182/bloodadvances.2024012756), 2024-04-11
Supplement: BLOODA_ADV-2024-012756-mmc1.pdf [file BLOODA_ADV-2024-012756-mmc1.pdf]

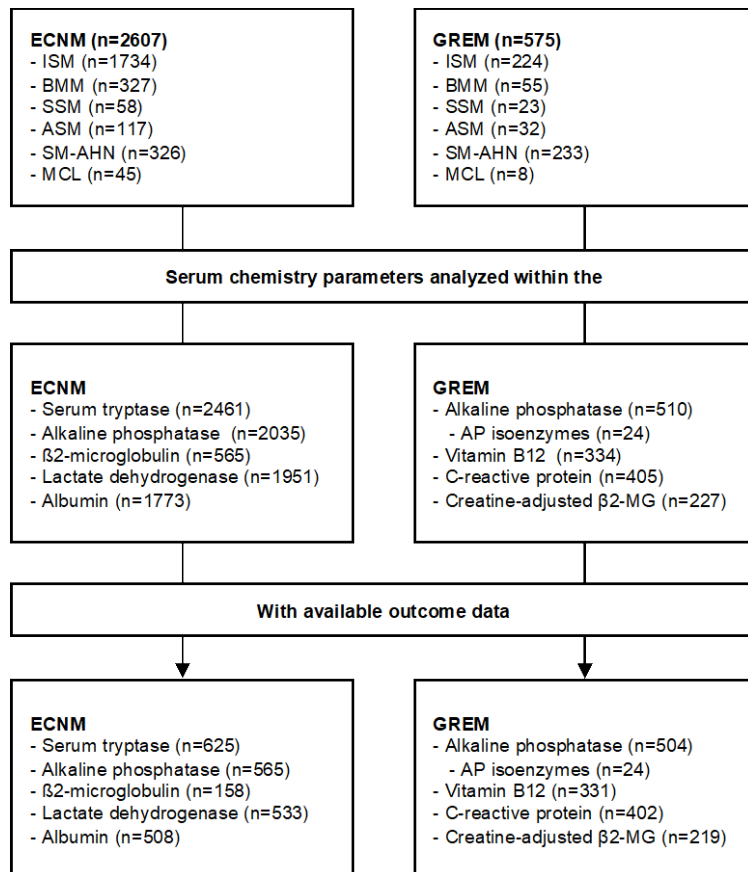

**Online Repository Figure E1 (ECNM and GREM). Patient flow diagram.**

Abbreviations: AdvSM, advanced systemic mastocytosis; AP, alkaline phosphatase; ASM, aggressive systemic mastocytosis; β2-MG, β2-microglobuline; BMM, bone marrow mastocytosis; ECNM, European Competence Network on Mastocytosis; GREM, German Registry on Eosinophils and Mast Cells; ISM, indolent systemic mastocytosis; MCL, mast cell leukemia; SM-AHN, systemic mastocytosis with an associated hematologic neoplasm; SSM, smoldering systemic mastocytosis.

**Online Repository Table E1.** Demographic and disease characteristics of 2607 SM patients enrolled within the ECNM.

|                                                  | <b>ISM</b>     | <b>BMM</b>     | <b>SSM</b>     | <b>ASM</b>     | <b>SM-AHN</b>  | <b>MCL</b>     |
|--------------------------------------------------|----------------|----------------|----------------|----------------|----------------|----------------|
| Number of patients, n (%)                        | 1734 (66)      | 327 (13)       | 58 (2)         | 117 (4)        | 326 (13)       | 45 (2)         |
| Age at diagnosis; median (range)                 | 47 (5-82)      | 53 (19-83)     | 57 (29-79)     | 60 (16-83)     | 66 (20-87)     | 54 (27-90)     |
| Male, n (%)                                      | 684/1734 (39)  | 208/327 (64)   | 23/58 (40)     | 68/117 (58)    | 226/326 (69)   | 26/45 (58)     |
| <b>C-findings</b>                                |                |                |                |                |                |                |
| Hemoglobin, g/dL; median (range)                 | 14 (10-18)     | 15 (10-18)     | 13 (10-17)     | 11 (4-17)      | 11 (4-18)      | 10 (7-15)      |
| <10g/dL, n (%)                                   | 0/1591 (0)     | 0/316 (0)      | 0/57 (0)       | 37/108 (34)    | 106/319 (33)   | 20/45 (44)     |
| Platelets, x10 <sup>9</sup> /L; median (range)   | 265 (30-930)   | 245 (99-589)   | 214 (75-581)   | 176 (5-681)    | 125 (5-969)    | 214 (75-581)   |
| <100x10 <sup>9</sup> /L, n (%)                   | 0/1591 (0)     | 0/316 (0)      | 0/57 (0)       | 34/108 (32)    | 139/319 (44)   | 22/45 (49)     |
| ANC, x10 <sup>9</sup> /L; median (range)         | 4 (0-15)       | 4 (0-42)       | 4 (1-22)       | 4 (0-26)       | 5 (0-86)       | 5 (1-76)       |
| <1x10 <sup>9</sup> /L, n (%)                     | 0/1513 (0)     | 0/310 (0)      | 0/50 (0)       | 7/98 (7)       | 15/306 (5)     | 1/42 (2)       |
| Alkaline phosphatase, U/L; median (range)        | 72 (28-317)    | 67 (22-142)    | 138 (44-517)   | 186 (20-1696)  | 159 (39-1407)  | 147 (55-989)   |
| >150U/L, n (%)                                   | 40/1289 (3)*   | 0/276 (0)      | 20/47 (43)     | 59/95 (62)     | 149/288 (52)   | 19/40 (48)     |
| Albumin level, g/L; median (range)               | 45 (28-57)     | 44 (32-53)     | 44 (34-54)     | 39 (18-52)     | 39 (16-57)     | 37 (25-54)     |
| <34g/L, n (%)                                    | 8/1112 (1)*    | 1/247 (0)*     | 0/34 (0)       | 19/77 (25)     | 57/269 (21)    | 9/34 (27)      |
| Ascites, n (%)                                   | 4/1546 (0)*    | 0/313 (0)      | 0/53 (0)       | 36/101 (36)    | 83/281 (30)    | 11/41 (27)     |
| Portal hypertension, n (%)                       | 3/1532 (0)*    | 1/314 (0)*     | 2/52 (4)*      | 16/95 (17)     | 30/245 (12)    | 2/33 (6)       |
| Weight loss (>10 % over last 6 months), n (%)    | 20/1622 (1)*   | 1/320 (0)*     | 2/57 (4)*      | 65/109 (60)    | 136/307 (44)   | 22/39 (56)     |
| Osteolytic lesions, n (%)                        | 11/1405 (1)*   | 1/298 (0)*     | 1/48 (2)*      | 30/99 (30)     | 15/238 (6)     | 4/32 (13)      |
| <b>B-findings</b>                                |                |                |                |                |                |                |
| Dysmyelopoiesis, n (%)                           | 19/1593 (1)    | 1/316 (0)      | 13/54 (24)     | 42/96 (44)     | 217/304 (71)   | 23/42 (55)     |
| MC-infiltration in BM biopsy, %; median (range)  | 10 (0-85)      | 5 (1-40)       | 40 (15-90)     | 30 (1-95)      | 20 (0-95)      | 75 (20-90)     |
| Serum tryptase level, µg/L; median (range)       | 32 (1-885)     | 21 (2-366)     | 202 (3-2100)   | 171 (9-1432)   | 135 (2-4980)   | 308 (75-4530)  |
| Serum tryptase level, ≥125µg/L, n (%)            | 138/1639 (8)   | 9/325 (3)      | 49/56 (88)     | 66/110 (60)    | 155/290 (53)   | 39/41 (95)     |
| Splenomegaly, n (%)                              | 77/1639 (5)    | 5/320 (2)      | 44/58 (76)     | 69/113 (61)    | 194/303 (64)   | 32/42 (76)     |
| Hepatomegaly, n (%)                              | 91/1634 (6)    | 13/318 (4)     | 33/58 (57)     | 60/112 (54)    | 148/300 (49)   | 23/42 (55)     |
| Lymphadenopathy, n (%)                           | 26/1536 (2)    | 6/314 (2)      | 15/49 (31)     | 40/98 (41)     | 106/248 (43)   | 9/34 (27)      |
| <b>Other relevant findings</b>                   |                |                |                |                |                |                |
| Leukocytes, x10 <sup>9</sup> /L; median (range)  | 6.5 (1.0-18.5) | 6.4 (1.0-67.0) | 6.3 (2.3-30.1) | 6.9 (1.2-38.9) | 9.3 (0.6-12.9) | 8.4 (2.0-97.3) |
| Monocytes, x10 <sup>9</sup> /L; median (range)   | 0.4 (0.0-3.6)  | 0.4 (0.0-4.0)  | 0.3 (0.0-2.1)  | 0.5 (0.0-5.7)  | 0.9 (0.0-18.7) | 0.5 (0.1-6.8)  |
| Eosinophils, x10 <sup>9</sup> /L; median (range) | 0.1 (0.0-7.5)  | 0.1 (0.0-2.9)  | 0.1 (0.0-7.5)  | 0.2 (0.0-1.8)  | 0.2 (0.0-18.5) | 0.3 (0.0-35.0) |
| <i>KIT</i> D816V positivity, n (%)               | 1229/1425 (86) | 250/287 (87)   | 41/42 (98)     | 88/96 (92)     | 258/291 (89)   | 25/39 (64)     |
| β2-microglobulin, ≥2.5mg/L, n (%)                | 25/317 (8)     | 7/117 (6)      | 4/12 (33)      | 22/29 (76)     | 61/78 (78)     | 8/12 (67)      |
| LDH, ≥260 U/L; n (%)                             | 96/1223 (8)    | 39/264 (15)    | 3/49 (6)       | 11/99 (11)     | 77/276 (28)    | 10/40 (25)     |
| <b>Outcome</b>                                   |                |                |                |                |                |                |
| Follow-up since diagnosis, median (range)        | 2.0 (0.0-28.7) | 2.3 (0.0-19.5) | 6.2 (1.0-17.4) | 2.5 (0.0-17.4) | 1.5 (0.0-15.6) | 1.0 (0.0-10.0) |
| Lost to follow-up, n                             | 1390 (80)      | 268 (82)       | 44 (76)        | 62 (53)        | 142 (44)       | 16 (36)        |
| Deaths, n (%)                                    | 47/1258 (4)    | 6/219 (3)      | 6/49 (12)      | 39/101 (39)    | 169/285 (59)   | 25/41 (61)     |

Abbreviations: ANC, absolute neutrophil count; ASM, aggressive systemic mastocytosis; BMM, bone marrow mastocytosis; ISM, indolent systemic mastocytosis; MCL, mast cell leukemia; SM-AHN, systemic mastocytosis with an associated hematological neoplasm; SSM, smoldering systemic mastocytosis. \* Not assessed as SM related C-findings.



**Online Repository Table E2.** Demographic and disease characteristics of 685 SM patients with available outcome data enrolled within the ECNM.

|                                                  | <b>ISM</b>     | <b>BMM</b>     | <b>SSM</b>     | <b>ASM</b>     | <b>SM-AHN</b>    | <b>MCL</b>     |
|--------------------------------------------------|----------------|----------------|----------------|----------------|------------------|----------------|
| Number of patients, n (%)                        | 344 (50)       | 59 (9)         | 14 (2)         | 55 (8)         | 184 (27)         | 29 (4)         |
| Age at diagnosis; median (range)                 | 45 (17-81)     | 49 (22-79)     | 56 (29-76)     | 64 (21-83)     | 67 (22-87)       | 58 (27-90)     |
| Male, n (%)                                      | 162/344 (47)   | 34/59 (58)     | 5/14 (36)      | 40/55 (73)     | 137/184 (73)     | 15/29 (52)     |
| <b>C-findings</b>                                |                |                |                |                |                  |                |
| Hemoglobin, g/dL; median (range)                 | 14 (10-18)     | 15 (11-18)     | 13 (10-16)     | 10 (4-16)      | 10 (6-16)        | 10 (7-13)      |
| <10g/dL, n (%)                                   | 0/320 (0)      | 0/54 (0)       | 0/14 (0)       | 26/52 (50)     | 77/179 (43)      | 15/29 (52)     |
| Platelets, x10 <sup>9</sup> /L; median (range)   | 258 (100-930)  | 250 (100-589)  | 209 (100-405)  | 116 (5-681)    | 94 (0-969)       | 87 (16-305)    |
| <100x10 <sup>9</sup> /L, n (%)                   | 0/320 (0)      | 0/54 (0)       | 0/14 (0)       | 20/52 (39)     | 95/179 (53)      | 17/29 (59)     |
| ANC, x10 <sup>9</sup> /L; median (range)         | 4 (0-15)       | 4 (0-10)       | 5 (2-22)       | 4 (0-26)       | 5 (0-80)         | 5 (1-13)       |
| <1x10 <sup>9</sup> /L, n (%)                     | 0/302 (0)      | 0/50 (0)       | 0/10 (0)       | 6/49 (12)      | 8/172 (5)        | 1/27 (4)       |
| Alkaline phosphatase, U/L; median (range)        | 80 (35-317)    | 73 (39-142)    | 143 (75-212)   | 218 (47-1696)  | 214 (39-1279)    | 148 (55-539)   |
| >150U/L, n (%)                                   | 21/270 (8)*    | 0/46 (0)       | 4/10 (40)*     | 35/47 (75)     | 103/167 (62)     | 12/25 (48)     |
| Albumin level, g/L; median (range)               | 45 (29-55)     | 45 (32-53)     | 48 (38-53)     | 35 (18-49)     | 38 (16-54)       | 37 (25-43)     |
| <34g/L, n (%)                                    | 2/241 (1)*     | 1/40 (3)*      | 0/5 (0)        | 14/42 (33)     | 46/158 (29)      | 7/32 (2)       |
| Ascites, n (%)                                   | 1/307 (0)*     | 0/55 (0)       | 0/12 (0)       | 21/45 (47)     | 56/159 (35)      | 8/27 (30)      |
| Portal hypertension, n (%)                       | 1/302 (0)*     | 0/56 (0)       | 0/11 (0)       | 8/42 (19)      | 24/137 (18)      | 2/22 (9)       |
| Weight loss (>10 % over last 6 months), n (%)    | 1/324 (0)*     | 0/56 (0)       | 0/14 (0)       | 37/53 (70)     | 100/175 (57)     | 14/24 (58)     |
| Osteolytic lesions, n (%)                        | 0/287 (0)      | 1/53 (2)*      | 3/14 (21)*     | 25/46 (54)     | 144/175 (82)     | 17/27 (63)     |
| <b>B-findings</b>                                |                |                |                |                |                  |                |
| Dysmyelopoiesis, n (%)                           | 5/321 (2)      | 1/53 (2)       | 3/14 (21)      | 25/46 (54)     | 144/175 (82)     | 17/27 (63)     |
| MC-infiltration in BM biopsy, %; median (range)  | 10 (0-50)      | 5 (1-20)       | 33 (15-90)     | 30 (1-95)      | 30 (2-95)        | 80 (20-100)    |
| Serum tryptase level, µg/L; median (range)       | 42 (3-885)     | 30 (4-366)     | 179 (60-486)   | 200 (9-1432)   | 173 (2-1022)     | 416 (114-4530) |
| Serum tryptase level, >125µg/L, n (%)            |                |                |                |                |                  |                |
| Splenomegaly, n (%)                              | 23/327 (7)     | 0/55 (0)       | 12/14 (86)     | 35/52 (67)     | 124/175 (71)     | 22/27 (82)     |
| Hepatomegaly, n (%)                              | 21/324 (7)     | 0/55 (0)       | 9/14 (64)      | 31/51 (61)     | 103/173 (60)     | 14/27 (52)     |
| Lymphadenopathy, n (%)                           | 3/297 (1)      | 2/54 (4)       | 3/10 (30)      | 16/41 (39)     | 74/141 (53)      | 6/22 (27)      |
| <b>Other relevant findings</b>                   |                |                |                |                |                  |                |
| Leukocytes, x10 <sup>9</sup> /L; median (range)  | 6.6 (1.0-15.0) | 7.0 (1.9-15.0) | 6.9 (3.6-30.1) | 6.9 (1.4-38.9) | 10.0 (0.6-111.7) | 9.5 (2.0-53.3) |
| Monocytes, x10 <sup>9</sup> /L; median (range)   | 0.4 (0.0-3.0)  | 0.4 (0.0-1.1)  | 0.2 (0.0-2.1)  | 0.4 (0.0-5.7)  | 1.0 (0.0-18.7)   | 0.5 (0.0-2.0)  |
| Eosinophils, x10 <sup>9</sup> /L; median (range) | 0.1 (0.0-3.4)  | 0.2 (0.0-1.1)  | 0.2 (0.0-1.8)  | 0.2 (0.0-18.5) | 0.3 (0.0-35.0)   | 0.1 (0.0-5.9)  |
| <i>KIT</i> D816V positivity, n (%)               | 217/261 (83)   | 30/44 (68)     | 10/10 (100)    | 36/41 (88)     | 143/158 (91)     | 13/25 (52)     |
| β2-microglobulin, ≥2.5mg/L, n (%)                | 7/80 (9)       | 7/59 (12)      | 2/5 (40)       | 10/13 (77)     | 28/35 (80)       | 6/8 (75)       |
| LDH, ≥260 U/L; n (%)                             | 17/256 (7)     | 7/41 (17)      | 1/10 (10)      | 8/49 (16)      | 51/151 (34)      | 9/26 (35)      |
| <b>Outcome</b>                                   |                |                |                |                |                  |                |
| Follow-up since diagnosis, median (range)        | 2.0 (0.0-28.6) | 2.3 (0.0-19.9) | 6.2 (1.0-17.4) | 2.5 (0-17.4)   | 1.5 (0.0-15.6)   | 1.0 (0.0-10.1) |
| Deaths, n (%)                                    | 47/344 (14)    | 6/59 (10)      | 6/14 (43)      | 39/55 (71)     | 166/184 (90)     | 25/29 (86)     |

Abbreviations: ANC, absolute neutrophil count; ASM, aggressive systemic mastocytosis; BMM, bone marrow mastocytosis; ISM, indolent systemic mastocytosis; MCL, mast cell leukemia; SM-AHN, systemic mastocytosis with an associated hematological neoplasm; SSM, smoldering systemic mastocytosis. \* Not assessed as SM related C-findings.



**Online Repository Table E3.** 1,951 patients with systemic mastocytosis (ECNM) stratified according to LDH  $\geq$ / $<$ 260U/L.

|                                                 | LDH $\geq$ 260U/L |                | LDH $<$ 260U/L  |                |
|-------------------------------------------------|-------------------|----------------|-----------------|----------------|
|                                                 | Presence of AHN   | Absence of AHN | Presence of AHN | Absence of AHN |
| Number of patients at diagnosis, n (%)          | 77 (33)           | 159 (67)       | 199 (12)        | 1516 (88)      |
| Age in years; median (range)                    | 63 (28-83)        | 50 (18-90)     | 67 (19-87)      | 48 (5-83)      |
| Male, n (%)                                     | 57/77 (74)        | 92/159 (58)    | 133/199 (67)    | 656/1516 (43)  |
| <b>C-Findings</b>                               |                   |                |                 |                |
| Hemoglobin, g/dL; median (range)                | 11 (4-17)         | 14 (6-18)      | 11 (7-18)       | 14 (4-18)      |
| <10g/dL, n (%)                                  | 31/77 (40)        | 13/156 (8)     | 62/196 (32)     | 45 (1496)      |
| Platelets, $\times 10^9$ /L; median (range)     | 103 (0-958)       | 239 (16-930)   | 120 (12-893)    | 258 (5-681)    |
| <100 $\times 10^9$ /L, n (%)                    | 38/77 (49)        | 13/156 (8)     | 86/196 (44)     | 55/1496 (4)    |
| ANC, $\times 10^9$ /L; median (range)           | 7 (0-86)          | 4 (0-19)       | 3.8 (0.1-72.2)  | 3.9 (0.0-75.9) |
| <1 $\times 10^9$ /L, n (%)                      | 5/75 (7)          | 2/147 (1)      | 7/192 (4)       | 13/1432 (1)    |
| Alkaline phosphatase, U/L; median (range)       | 135 (39-1010)     | 74 (34-1696)   | 177 (47-1407)   | 74 (20-989)    |
| >150U/L, n (%)                                  | 36/76 (47)        | 22/127 (16)    | 102/189 (54)    | 104/1416 (7)   |
| Albumin level, g/L; median (range)              | 38 (16-54)        | 42 (18-55)     | 40 (21-54)      | 44 (20-57)     |
| <34g/L, n (%)                                   | 16/66 (24)        | 10/122 (8)     | 33/177 (19)     | 25 (2)         |
| Ascites, n (%)                                  | 15/71 (21)        | 8/156 (5)      | 61/180 (34)     | 36/1421 (3)    |
| Portal hypertension, n (%)                      | 5/64 (8)          | 2/153 (1)      | 22/155 (14)     | 20/1403 (1)    |
| Weight loss (>10 % over last 6 months), n (%)   | 30/75 (40)        | 14/156 (9)     | 90/189 (48)     | 82/1465 (6)    |
| Osteolytic lesions, n (%)                       | 4/59 (7)          | 3/147 (2)      | 11/157 (7)      | 36/1301 (3)    |
| <b>B-Findings</b>                               |                   |                |                 |                |
| Dysmyelopoiesis, n (%)                          | 55/72 (76)        | 9/157 (6)      | 132/184 (72)    | 74/1425 (5)    |
| BM MC infiltration, %; median (range)           | 15 (1-90)         | 10 (0-100)     | 30 (0-95)       | 10 (0-100)     |
| Serum tryptase level, $\mu$ g/L; median (range) | 129 (6-673)       | 34 (1-4530)    | 149 (2-4980)    | 32 (3-2100)    |
| >125 $\mu$ g/L, n (%)                           | 35/67 (52)        | 24/153 (16)    | 105/188 (56)    | 225 (15)       |
| Splenomegaly, n (%)                             | 42/73 (58)        | 23/158 (15)    | 131/191 (69)    | 160/1481 (11)  |
| Hepatomegaly, n (%)                             | 37/75 (49)        | 21/159 (13)    | 93/186 (50)     | 156/1476 (11)  |
| Lymphadenopathy, n (%)                          | 22/60 (37)        | 10/150 (7)     | 75/163 (46)     | 73/1402 (5)    |
| <b>Other relevant findings</b>                  |                   |                |                 |                |
| Leukocytes, $\times 10^9$ /L; median (range)    | 15.0 (0.0-129.3)  | 6.7 (1.1-53.3) | 7.7 (1.0-83.0)  | 6.6 (1.0-97.3) |
| >16.000 $\times 10^9$ /L, n (%)                 | 36/77 (47)        | 11/157 (7)     | 37/198 (19)     | 18/1495 (1)    |
| Monocytes, $\times 10^9$ /L; median (range)     | 0.5 (0.0-18.7)    | 0.4 (0.0-8.2)  | 0.8 (0.0-8.2)   | 0.4 (0.0-6.8)  |
| >0.8 $\times 10^9$ /L                           | 44/76 (58)        | 16/132 (12)    | 96/190 (51)     | 95/1406 (7)    |
| Eosinophils, $\times 10^9$ /L; median (range)   | 0.4 (0.0-35.0)    | 0.1 (0.0-3.5)  | 0.2 (0.0-13.3)  | 0.1 (0.0-18.5) |
| >1.5 $\times 10^9$ /L                           | 17/73 (23)        | 6/136 (4)      | 33/184 (18)     | 24/1402 (2)    |
| <i>KIT</i> D816V positive, n (%)                | 58/68 (85)        | 105/131 (80)   | 166/186 (89)    | 1142/1309 (87) |
| BM MC burden in smears, %; median (range)       | 5 (0-30)          | 5 (0-80)       | 7 (1-80)        | 1 (0-100)      |
| <b>Outcome</b>                                  |                   |                |                 |                |
| Follow-up, years, median (range)                | 1.3 (0.1-9.2)     | 2.4 (0.0-22.3) | 1.9 (0.0-15.6)  | 2.1 (0.0-28.6) |
| Death, n (%)                                    | 47/72 (65)        | 18/145 (12)    | 93/165 (56)     | 84/1071 (8)    |

Abbreviations: ANC, absolute neutrophil count; AHN, associated hematologic neoplasm; BM, bone marrow; GI, gastrointestinal; MC, mast cell; NS., not significant
